# Supplementary material for: Do Seabirds Differ from Other Migrants in Their Travel Arrangements? On Route Strategies of Cory’s Shearwater during Its Trans-Equatorial Journey
Source: PLOS journal article supplement (doi:10.1371/journal.pone.0049376), 2012-11-07

**Supporting information to manuscript:** *Do Seabirds Differ from Other Migrants in their Travel Arrangements? On Route Strategies of Cory's Shearwater during its Trans-Equatorial Journey* by Maria P. Dias, José P. Granadeiro & Paulo Catry

**Figure S1. Example of a daily activity pattern of a Cory's shearwater during its outward migration.** Dashed vertical lines represent sunset and sunrise. Horizontal bars represent foraging bouts (dark grey) and flight bouts (light grey).

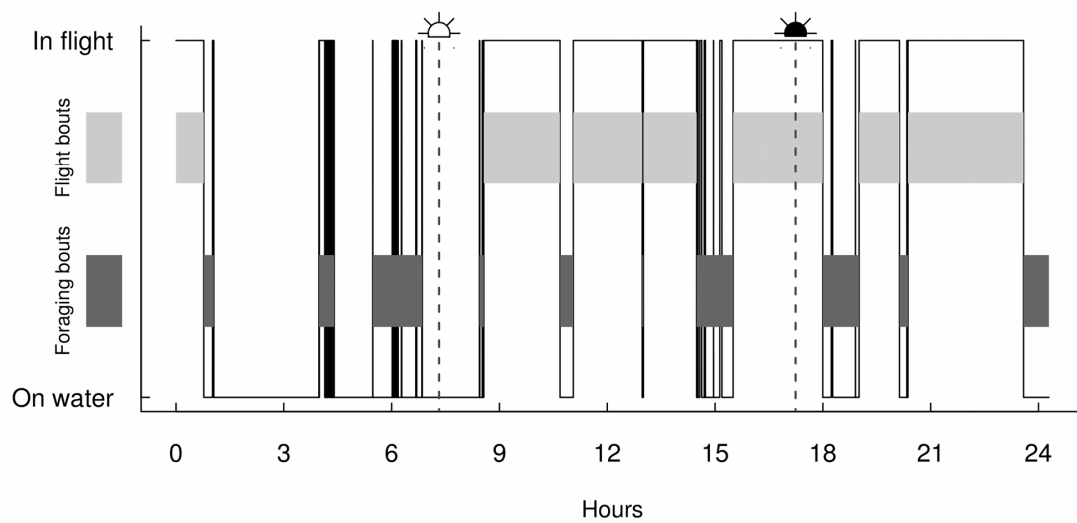

Supplement: S1 (10.1371/journal.pone.0049376.s001) [file journal.pone.0049376.s001]
